# Supplementary material for: Detailed voltammetric and EPR study of protonation reactions accompanying the one-electron reduction of Keggin-type polyoxometalates, [XVVM11O40]4− (X = P, As; M = Mo, W) in acetonitrile
Source: Royal Society of Chemistry journal article supplement (doi:10.1039/c003248d), 2010-01-01
Supplement: c003248d.pdf [file c003248d.pdf]

## Supporting Information

### Detailed Voltammetric and EPR Study of Protonation Reactions Accompanying the One-Electron Reduction of Keggin-type Polyoxometalates, $[XV^V M_{11} O_{40}]^{4-}$ (X=P, As; M=Mo, W) in Acetonitrile

*Jun-ichi Nambu<sup>a</sup>, Tadaharu Ueda<sup>a,\*</sup>, Si-Xuan Guo<sup>b</sup>, John F. Boas<sup>c</sup>, Alan M. Bond<sup>b</sup>*

<sup>a</sup> Department of Applied Science, Faculty of Science, Kochi University, Kochi, 780-8520 Japan

<sup>b</sup> School of Chemistry, Monash University, Clayton, Vic. 3800, Australia

<sup>c</sup> School of Physics, Monash University, Clayton, Vic. 3800, Australia

#### Further description of EPR results

For  $PV^{IV}Mo_{11}$ , addition of 0.4 mM  $CF_3SO_3H$  resulted in the appearance of two new species, labeled as B and C, where these contributed about 10 % for B and 20% for C while the original species, labeled as A, contributed approximately 70% to the total resonance intensity. Addition of 5 mM  $CF_3SO_3H$  resulted in the almost complete disappearance of the resonances due to A and B.

In the case of  $AsV^{IV}Mo_{11}$ , addition of acid to 0.4 mM, resulted in the observation of two additional species, labelled as B and C. The relative concentrations were estimated as 40, 25, and 35 % for species A, B and C respectively. After addition of 5.0 mM acid, species A and B comprised only about 5 % of the paramagnetic species present, leaving species C as the major component. Species C also showed indications of orthorhombic symmetry.

For  $PV^{IV}W_{11}$ , the addition of 0.4 mM  $CF_3SO_3H$  resulted in the observation of two species, namely the original species A, and a distinctly different species, labelled as B. Resonances due to species A comprised about 55% and B 45% of the spectral intensity. The spectrum after addition of 5 mM acid was very similar to that of the 0.4 mM acid solution, with both species A and B being present but with their relative concentrations reversed. Spectrum simulations gave the values for the spin Hamiltonian parameters listed in Table 4.

For  $AsV^{IV}W_{11}$  in  $CH_3CN$ , the addition of 0.4 mM  $CF_3SO_3H$  resulted in two clearly distinguishable species, namely the species present before addition of acid (species A in Table 5) and species B. After addition of 5.0 mM  $CF_3SO_3H$ , species A had disappeared completely. Resonances due to species B comprised about 70 % of the total spectral intensity, with resonances due to another new species, species C, accounting for the remaining 30 % of the total EPR intensity.

**Figure S1.** Cyclic voltammograms for reduction of 0.5 mM  $\text{As}^{\text{V}}\text{W}_{11}$  in  $\text{CH}_3\text{CN}$  (0.1 M  $[\text{n-Bu}_4\text{N}][\text{PF}_6]$ ) as a function of acid concentration.  $[\text{CF}_3\text{SO}_3\text{H}] =$  (a) 0; (b) 0.2; (c) 0.4; (d) 0.5; (e) 1.0; (f) 5.0 mM. Scan rate:  $100 \text{ mV s}^{-1}$ . Arrows indicate new peaks that appear and then shift on addition of more acid.

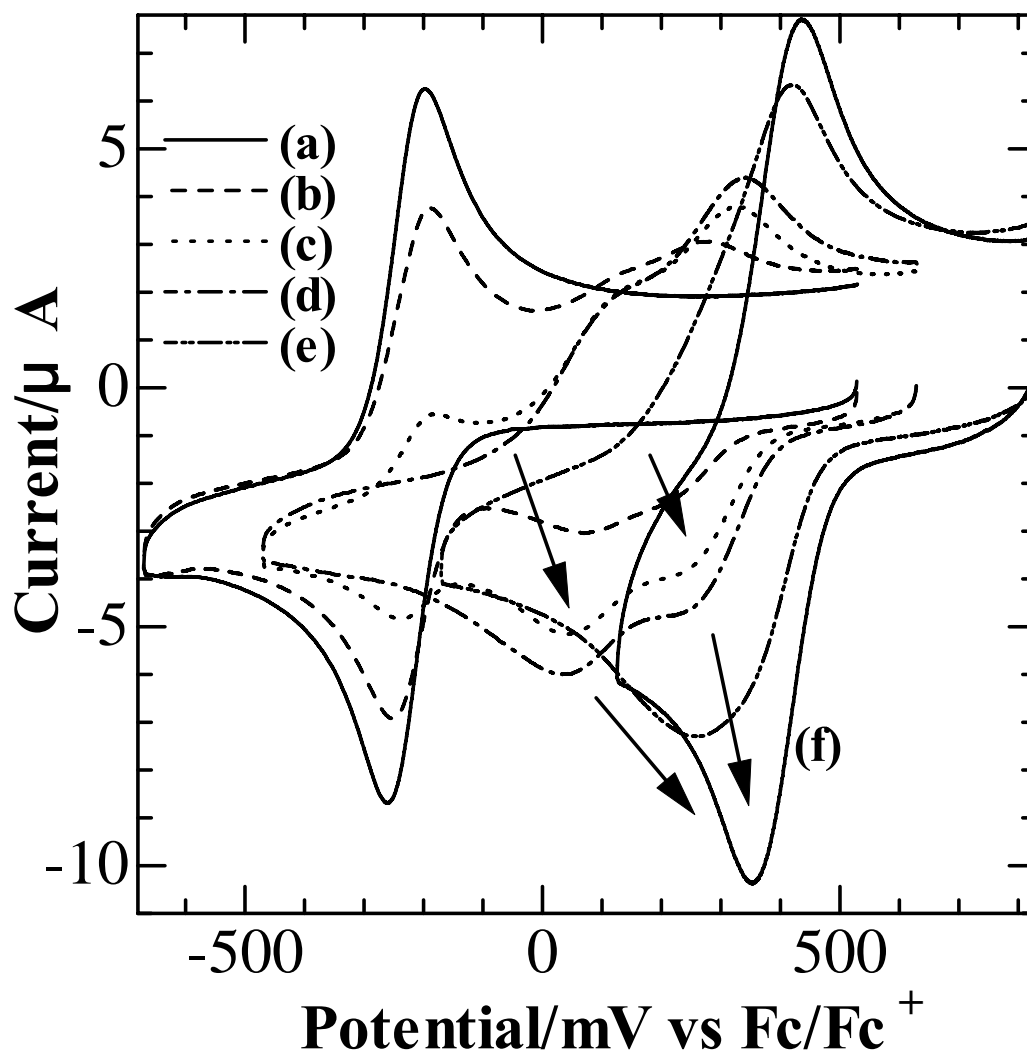

**Figure S2.** Cyclic voltammograms for reduction of 0.5 mM  $\text{AsV}^{\text{V}}\text{Mo}_{11}$  in  $\text{CH}_3\text{CN}$  (0.1 M  $[\text{n-Bu}_4\text{N}][\text{PF}_6]$ ) as a function of acid concentration.  $[\text{CF}_3\text{SO}_3\text{H}] =$  (a) 0; (b) 0.2; (c) 0.4; (d) 0.5; (e) 0.7; (f) 1.0; (g) 5.0 mM. Scan rate:  $100 \text{ mV s}^{-1}$ .

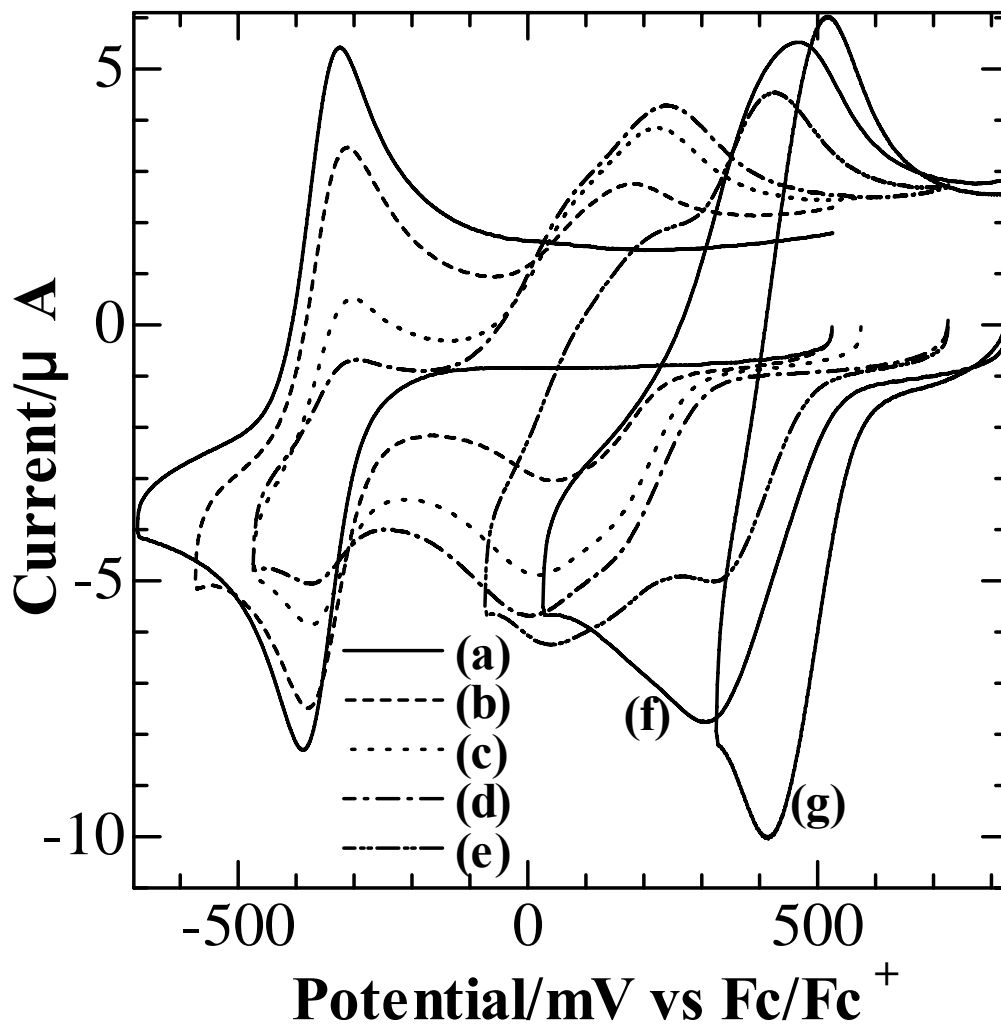

**Table S1.** Parameters used in the digital simulation of cyclic voltammograms for reduction of  $\text{AsV}^{\text{V}}\text{W}_{11}$  to  $\text{AsV}^{\text{IV}}\text{W}_{11}$  in acidified acetonitrile solution

| <b>Heterogeneous reactions</b>                     |                                                               |                                                                |                                                               |                                                                |
|----------------------------------------------------|---------------------------------------------------------------|----------------------------------------------------------------|---------------------------------------------------------------|----------------------------------------------------------------|
| Process                                            | $\text{A} + \text{e}^- = \text{B}$                            | $\text{HA} + \text{e}^- = \text{HB}$                           | $\text{H}_2\text{A} + \text{e}^- = \text{H}_2\text{B}$        |                                                                |
| $E_{\text{mid}}/\text{mV}$                         | -230                                                          | 170                                                            | 400                                                           |                                                                |
| <b>Homogeneous reactions</b>                       |                                                               |                                                                |                                                               |                                                                |
| Process                                            | $\text{HA} \rightleftharpoons \text{A} + \text{H}^+$          | $\text{H}_2\text{A} \rightleftharpoons \text{HA} + \text{H}^+$ | $\text{HB} \rightleftharpoons \text{B} + \text{H}^+$          | $\text{H}_2\text{B} \rightleftharpoons \text{HB} + \text{H}^+$ |
| Acid dissociation const. $K(\text{M})$             | $2.00 \times 10^{-6}$                                         | $1.21 \times 10^{-3}$                                          | $3.47 \times 10^{-13}$                                        | $1.57 \times 10^{-7}$                                          |
| Forward rate const. $k_f(\text{s}^{-1})$           | $2.00 \times 10^4$                                            | $1.21 \times 10^7$                                             | $3.47 \times 10^{-3}$                                         | $1.57 \times 10^3$                                             |
| Back rate const. $k_b(\text{M}^{-1}\text{s}^{-1})$ | $1.00 \times 10^{10}$                                         | $1.00 \times 10^{10}$                                          | $1.00 \times 10^{10}$                                         | $1.00 \times 10^{10}$                                          |
| <b>Disproportionation reaction</b>                 |                                                               |                                                                |                                                               |                                                                |
| Process                                            | $2\text{HA} \rightleftharpoons \text{A} + \text{H}_2\text{A}$ |                                                                | $2\text{HB} \rightleftharpoons \text{B} + \text{H}_2\text{B}$ |                                                                |
| Equilibrium const. $K_{\text{eq}}(\text{M})$       | $1.66 \times 10^{-3}$                                         |                                                                | $2.22 \times 10^{-6}$                                         |                                                                |

A:  $[\text{AsV}^{\text{V}}\text{W}_{11}\text{O}_{40}]^{4-}$ ; B:  $[\text{AsV}^{\text{IV}}\text{W}_{11}\text{O}_{40}]^{5-}$

**Table S2.** Parameters used in the digital simulation of cyclic voltammograms for reduction of  $\text{AsV}^{\text{V}}\text{Mo}_{11}$  to  $\text{AsV}^{\text{IV}}\text{Mo}_{11}$  in acidified acetonitrile solution

| <b>Heterogeneous reactions</b>                     |                                                               |                                                                |                                                                         |                                                                         |
|----------------------------------------------------|---------------------------------------------------------------|----------------------------------------------------------------|-------------------------------------------------------------------------|-------------------------------------------------------------------------|
| Process                                            | $\text{A} + \text{e}^- = \text{B}$                            | $\text{HA} + \text{e}^- = \text{HB}$                           | $\text{H}_2\text{A} + \text{e}^- = \text{H}_2\text{B}$                  | $\text{H}_3\text{A} + \text{e}^- = \text{H}_3\text{B}$                  |
| $E_{\text{mid}}/\text{mV}$                         | -355                                                          | 105                                                            | 425                                                                     | 775                                                                     |
| <b>Homogeneous reactions</b>                       |                                                               |                                                                |                                                                         |                                                                         |
| Process                                            | $\text{HA} \rightleftharpoons \text{A} + \text{H}^+$          | $\text{H}_2\text{A} \rightleftharpoons \text{HA} + \text{H}^+$ | $\text{H}_3\text{A} \rightleftharpoons \text{H}_2\text{A} + \text{H}^+$ |                                                                         |
| Acid dissociation const. $K(\text{M})$             | $7.02 \times 10^{-7}$                                         | $1.83 \times 10^{-2}$                                          | $6.53$                                                                  |                                                                         |
| Forward rate const. $k_f(\text{s}^{-1})$           | $7.02 \times 10^3$                                            | $1.83 \times 10^8$                                             | $6.53 \times 10^{10}$                                                   |                                                                         |
| Back rate const. $k_b(\text{M}^{-1}\text{s}^{-1})$ | $1.00 \times 10^{10}$                                         | $1.00 \times 10^{10}$                                          | $1.00 \times 10^{10}$                                                   |                                                                         |
| Process                                            | $\text{HB} \rightleftharpoons \text{B} + \text{H}^+$          | $\text{H}_2\text{B} \rightleftharpoons \text{HB} + \text{H}^+$ | $\text{H}_3\text{B} \rightleftharpoons \text{H}_2\text{B} + \text{H}^+$ |                                                                         |
| Acid dissociation const. $K(\text{M})$             | $1.18 \times 10^{-14}$                                        | $7.14 \times 10^{-8}$                                          | $1.17 \times 10^{-5}$                                                   |                                                                         |
| Forward rate const. $k_f(\text{s}^{-1})$           | $1.18 \times 10^{-4}$                                         | $7.14 \times 10^2$                                             | $1.17 \times 10^5$                                                      |                                                                         |
| Back rate const. $k_b(\text{M}^{-1}\text{s}^{-1})$ | $1.00 \times 10^{10}$                                         | $1.00 \times 10^{10}$                                          | $1.00 \times 10^{10}$                                                   |                                                                         |
| <b>Disproportionation reactions</b>                |                                                               |                                                                |                                                                         |                                                                         |
| Process                                            | $2\text{HA} \rightleftharpoons \text{A} + \text{H}_2\text{A}$ | $2\text{HB} \rightleftharpoons \text{B} + \text{H}_2\text{B}$  | $2\text{H}_2\text{A} \rightleftharpoons \text{HA} + \text{H}_3\text{A}$ | $2\text{H}_2\text{B} \rightleftharpoons \text{HB} + \text{H}_3\text{B}$ |
| Equilibrium const. $K_{\text{eq}}(\text{M})$       | $3.84 \times 10^{-5}$                                         | $1.65 \times 10^{-7}$                                          | $2.80 \times 10^{-3}$                                                   | $6.09 \times 10^{-3}$                                                   |

A:  $[\text{AsV}^{\text{V}}\text{Mo}_{11}\text{O}_{40}]^{4-}$ ; B:  $[\text{AsV}^{\text{IV}}\text{Mo}_{11}\text{O}_{40}]^{5-}$
